# Supplementary material
Source: PubMed Central journal article supplement (PMC4570541)
Supplement: pro0024-1475-sd5.pdf [file pro0024-1475-sd5.pdf]

| Amino acid combinations correlated with helix (size 5-40) |       |      |               |        |      |                   |           |      |
|-----------------------------------------------------------|-------|------|---------------|--------|------|-------------------|-----------|------|
| Top 50                                                    | R     | Size | Bottom 50     | R      | Size | Middle 50         | R         | Size |
| AEIKLMQR                                                  | 0.590 | 8    | CDGHKNPRSTV   | -0.595 | 11   | FHLMNPQVW         | 2.607E-5  | 9    |
| AEFIKLMQR                                                 | 0.579 | 9    | CDGHKNPRSTVY  | -0.594 | 12   | GHIKLMRSTW        | 2.497E-5  | 10   |
| AEILMQ                                                    | 0.576 | 6    | CDGHKNPSTVW   | -0.594 | 11   | DEFKMNPRV         | 2.450E-5  | 9    |
| AEIKLMQ                                                   | 0.575 | 7    | CDGHNPSTV     | -0.593 | 9    | AEHKNST           | 2.343E-5  | 7    |
| AEKLMQ                                                    | 0.574 | 6    | CDGHKNPSTV    | -0.593 | 10   | AEFGHLNSWY        | 2.288E-5  | 10   |
| AIKLMQR                                                   | 0.573 | 7    | CDGHNPSTVY    | -0.593 | 10   | CEGIKLNQRY        | 2.122E-5  | 11   |
| AEILMQR                                                   | 0.569 | 7    | CDGHKNPRSTVW  | -0.591 | 12   | ADHLPRTW          | 2.080E-5  | 8    |
| AEIKLMQRY                                                 | 0.567 | 9    | CDFGHKNPRSTV  | -0.588 | 12   | CFHILMPRT         | 2.069E-5  | 9    |
| AEKLMQR                                                   | 0.567 | 7    | CDGHNPSTVW    | -0.587 | 10   | ADFHMKPQRTVY      | 2.063E-5  | 13   |
| ADEIKLMQR                                                 | 0.563 | 9    | CDGHNPSTVY    | -0.585 | 11   | CFIKLMPQRTVW      | 1.996E-5  | 12   |
| AEKLM                                                     | 0.561 | 5    | CGHNPSTVY     | -0.584 | 9    | DIKQRTV           | 1.930E-5  | 7    |
| AEFILMQR                                                  | 0.561 | 8    | CDGHKPSTVY    | -0.582 | 10   | AEFGHIKLPQSTY     | 1.901E-5  | 13   |
| AEIKLMR                                                   | 0.560 | 7    | CDFGHKNPRSTVW | -0.582 | 13   | ACGIKLNQVW        | 1.862E-5  | 11   |
| AEFKLMQR                                                  | 0.559 | 8    | CDGHKNPSTVY   | -0.581 | 11   | CDGIKLMRSV        | 1.748E-5  | 10   |
| AEIKLQR                                                   | 0.559 | 7    | CDFGHNPSTV    | -0.581 | 10   | ACDEHKLMPRSTVW    | 1.703E-5  | 14   |
| AEILM                                                     | 0.559 | 5    | CDGNPSTV      | -0.580 | 8    | DEFIMNTV          | 1.659E-5  | 8    |
| AEIKLMNQR                                                 | 0.556 | 9    | CGHNPSTV      | -0.579 | 8    | ACDFHIKLSY        | 1.529E-5  | 11   |
| AEIKLMQRS                                                 | 0.556 | 9    | CDEGHNPSTVY   | -0.579 | 11   | ACEFGHILNPQRWY    | 1.440E-5  | 14   |
| AFIKLMQR                                                  | 0.555 | 8    | CDGHPSTVY     | -0.578 | 9    | DEFHIQRTVY        | 1.405E-5  | 10   |
| AEILMQRY                                                  | 0.555 | 8    | CDEGHNPSTV    | -0.578 | 10   | ACEHIKNPQRT       | 1.334E-5  | 11   |
| AEIKLMQRW                                                 | 0.555 | 9    | CDGHIKNPRSTVW | -0.577 | 13   | DGLMQRTW          | 1.325E-5  | 9    |
| AEFILMQ                                                   | 0.554 | 7    | CGHKNPSTVW    | -0.577 | 10   | CDEFGHILMRSVY     | 1.299E-5  | 13   |
| AEFKLMQ                                                   | 0.553 | 7    | CDGNPSTVY     | -0.577 | 9    | EIMPVY            | 1.130E-5  | 6    |
| AEFIKLMQ                                                  | 0.552 | 8    | CDFGHKNPRSTVY | -0.577 | 13   | AFIMNPRVY         | 1.129E-5  | 9    |
| AEHIKLMQR                                                 | 0.551 | 9    | CDFGHKNPSTVW  | -0.577 | 12   | ADFHQRTVW         | 1.069E-5  | 10   |
| AELMQ                                                     | 0.551 | 5    | CDFGHKNPSTV   | -0.576 | 11   | EFGHILNVY         | -1.056E-5 | 9    |
| AEKLMNQR                                                  | 0.551 | 8    | CDEGHNPSTVW   | -0.576 | 11   | ACDFHIKMPRW       | -1.129E-5 | 11   |
| AIKLMQ                                                    | 0.551 | 6    | CDGHKPSTVW    | -0.576 | 10   | DFGHLMNQR         | -1.141E-5 | 10   |
| AEILMNQR                                                  | 0.550 | 8    | CDGHKPSTV     | -0.575 | 9    | DEFGILMRSTVW      | -1.218E-5 | 12   |
| ADEFIKLMQR                                                | 0.550 | 10   | CDFGHNPSTVW   | -0.575 | 11   | ACEFHLPRST        | -1.322E-5 | 10   |
| AELM                                                      | 0.549 | 4    | CDGNPSTVW     | -0.574 | 9    | AFGHILNVW         | -1.462E-5 | 9    |
| AEILQ                                                     | 0.549 | 5    | CGHNPSTVW     | -0.574 | 9    | ACEFHMSVW         | -1.495E-5 | 9    |
| AIKLMR                                                    | 0.548 | 6    | CGHKNPSTV     | -0.574 | 9    | DFGKLMRST         | -1.525E-5 | 9    |
| AKLM                                                      | 0.548 | 4    | CDFGHNPSTVY   | -0.573 | 11   | ACDEINQRTVY       | -1.537E-5 | 11   |
| AEKLMQRY                                                  | 0.548 | 8    | CDFGHNPSTVY   | -0.573 | 12   | ACEFKLPQRSTVW     | -1.563E-5 | 13   |
| AEKLMR                                                    | 0.548 | 6    | CDGHNPSTVW    | -0.573 | 11   | ACDGLQWY          | -1.656E-5 | 8    |
| AEILMR                                                    | 0.547 | 6    | CGHKNPSTVY    | -0.573 | 11   | CDEFHIRW          | -1.726E-5 | 8    |
| AEIKLM                                                    | 0.546 | 6    | CDGHNPSTV     | -0.573 | 10   | EGHLMNTV          | -1.799E-5 | 8    |
| AKLMQ                                                     | 0.546 | 5    | CDGKNPSTVW    | -0.571 | 10   | ACDEFHIKLMNPQSTVW | -1.994E-5 | 17   |
| AEFIKLR                                                   | 0.546 | 8    | CDFGHNPSTV    | -0.571 | 11   | DEHIKLPSTVY       | -2.048E-5 | 10   |
| AEFIKLMQRS                                                | 0.546 | 10   | CDGPSTVY      | -0.571 | 8    | DFMQRSWY          | -2.059E-5 | 8    |
| AEIKLQ                                                    | 0.546 | 6    | CGNPSTVY      | -0.570 | 8    | CDEIKLMPTWY       | -2.086E-6 | 11   |
| AEILMQY                                                   | 0.546 | 7    | CGHKNPSTVY    | -0.570 | 10   | ADFHILKNPSTVY     | -2.090E-5 | 13   |
| AEFIKLMQRY                                                | 0.544 | 10   | CDEGHKNPSTVW  | -0.569 | 12   | CDEFHKLNQST       | -2.100E-5 | 11   |
| AEFHILKLMQR                                               | 0.543 | 10   | CDGHNPSTVY    | -0.569 | 12   | DEHKLMPRSTVY      | -2.323E-5 | 12   |
| AEFIKLMR                                                  | 0.542 | 8    | CFGHNPSTV     | -0.569 | 9    | ACDEHQTY          | -2.342E-5 | 8    |
| AIKLMQRY                                                  | 0.541 | 8    | CGHKNPSTVY    | -0.568 | 9    | ACDEFGLPQW        | -2.355E-5 | 10   |
| AKLMQR                                                    | 0.541 | 6    | CDGHKNPSTVY   | -0.568 | 11   | CEFGMLQRTV        | -2.458E-5 | 11   |
| ADEKLMQR                                                  | 0.540 | 8    | CDGKNPSTV     | -0.568 | 9    | CEIKLNPQRSVY      | -2.574E-5 | 12   |
| AEIKLMQW                                                  | 0.540 | 8    | CDGNPSTVY     | -0.568 | 10   | DIKLNQST          | -2.704E-6 | 8    |
